# Supplementary material for: The total mass and spatial–temporal variability of aerial cryosphere over the Tibetan Plateau from 2003 to 2020
Source: Frontiers journal article supplement (doi:10.3389/feart.2022.998603), 2023-01-05
Supplement: Data_Sheet_1.docx [file Data_Sheet_1.docx]

Supplementary Material


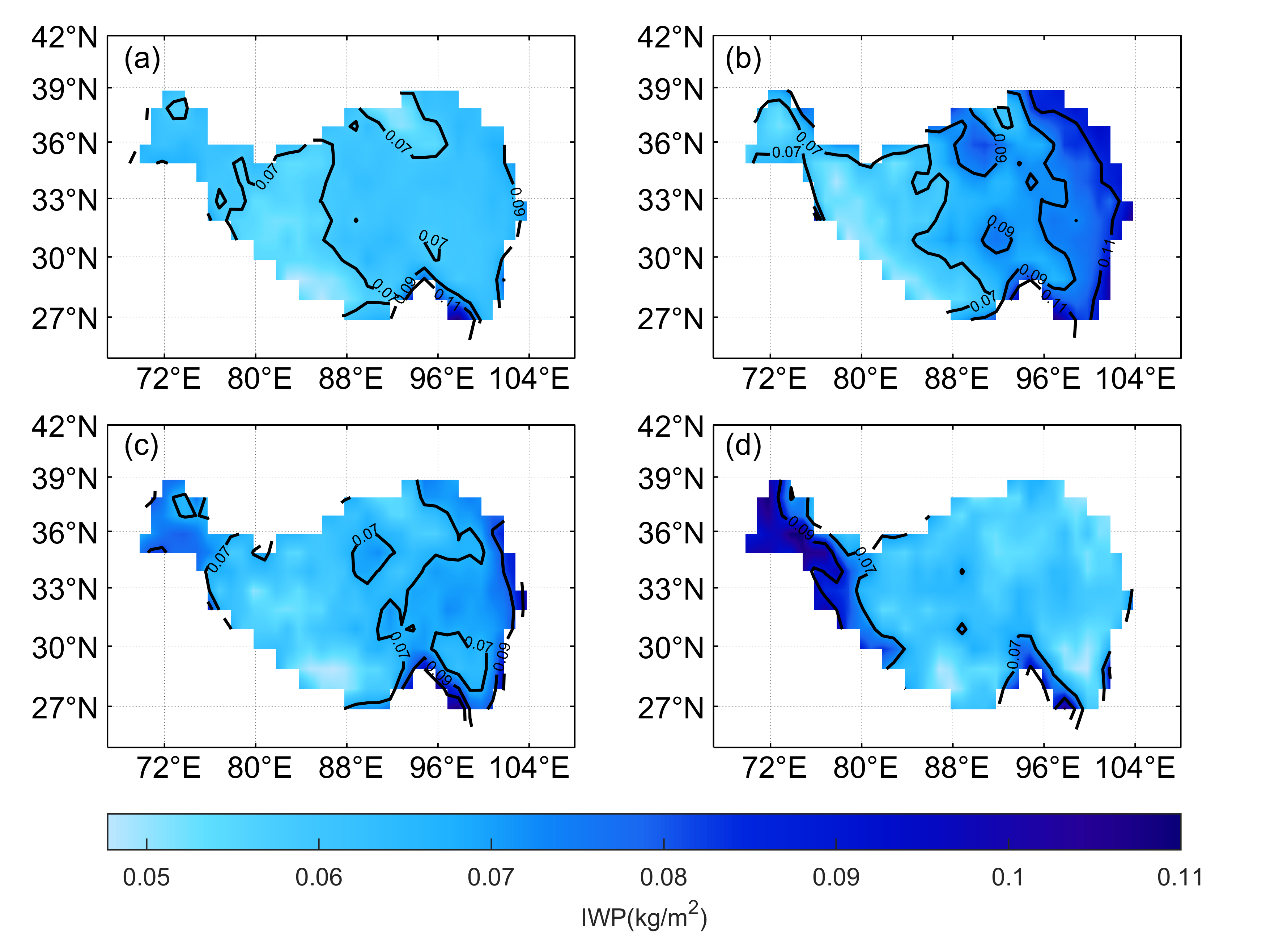


**Supplementary Figure 1.** Spatial distributions of atmospheric ice over the TP in different seasons retrieved by Terra satellite from 2003-2020. (a) Spring (MAM) (b) Summer (JJA) (c) Autumn (SON) (d) Winter (DJF)

**
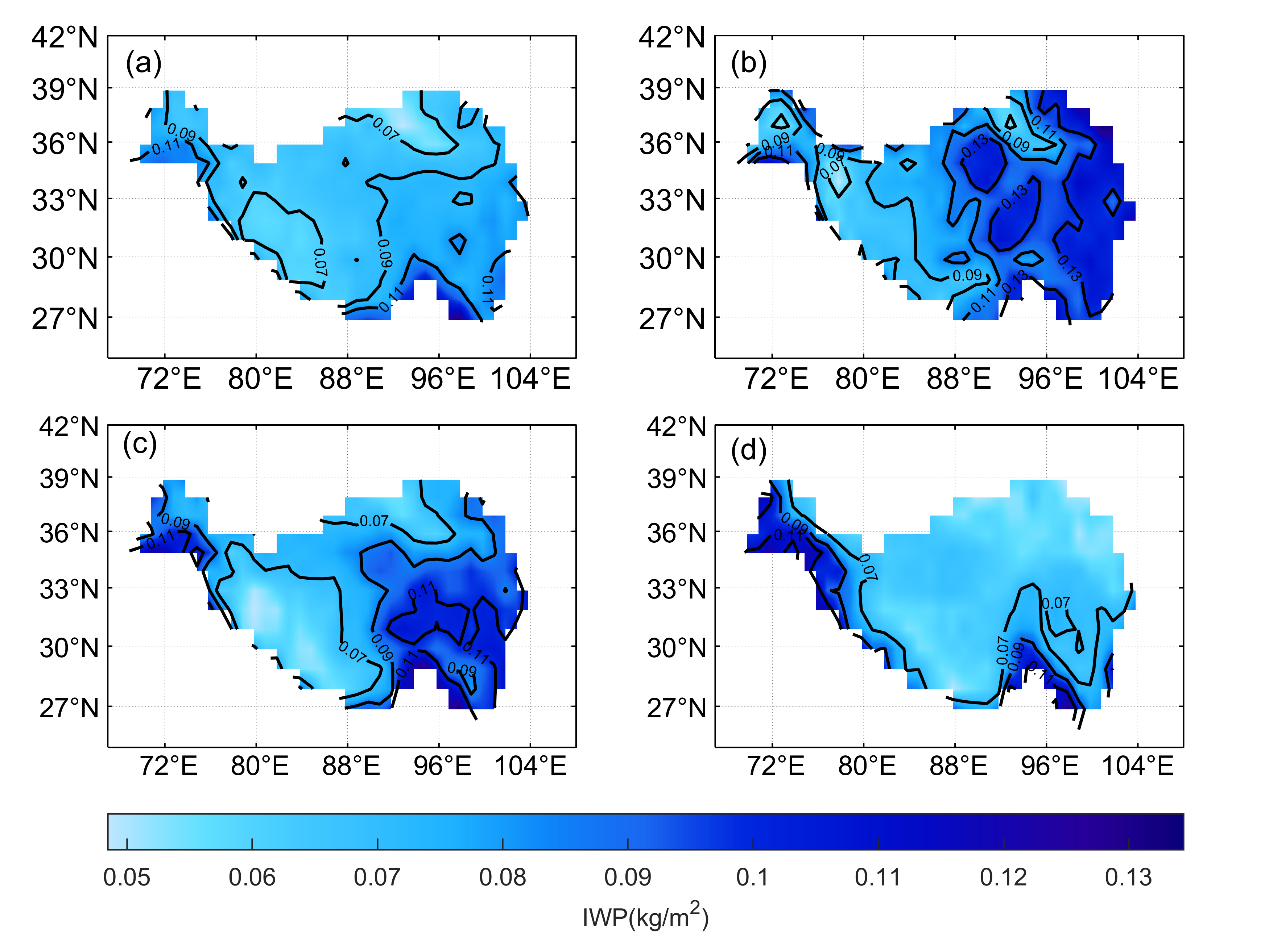
**

**Supplementary Figure 2.** Spatial distributions of atmospheric ice over the TP in different seasons retrieved by Suomi NPP and NOAA-20 satellites from 2013-2020. (a) Spring (MAM) (b) Summer (JJA) (c) Autumn (SON) (d) Winter (DJF)


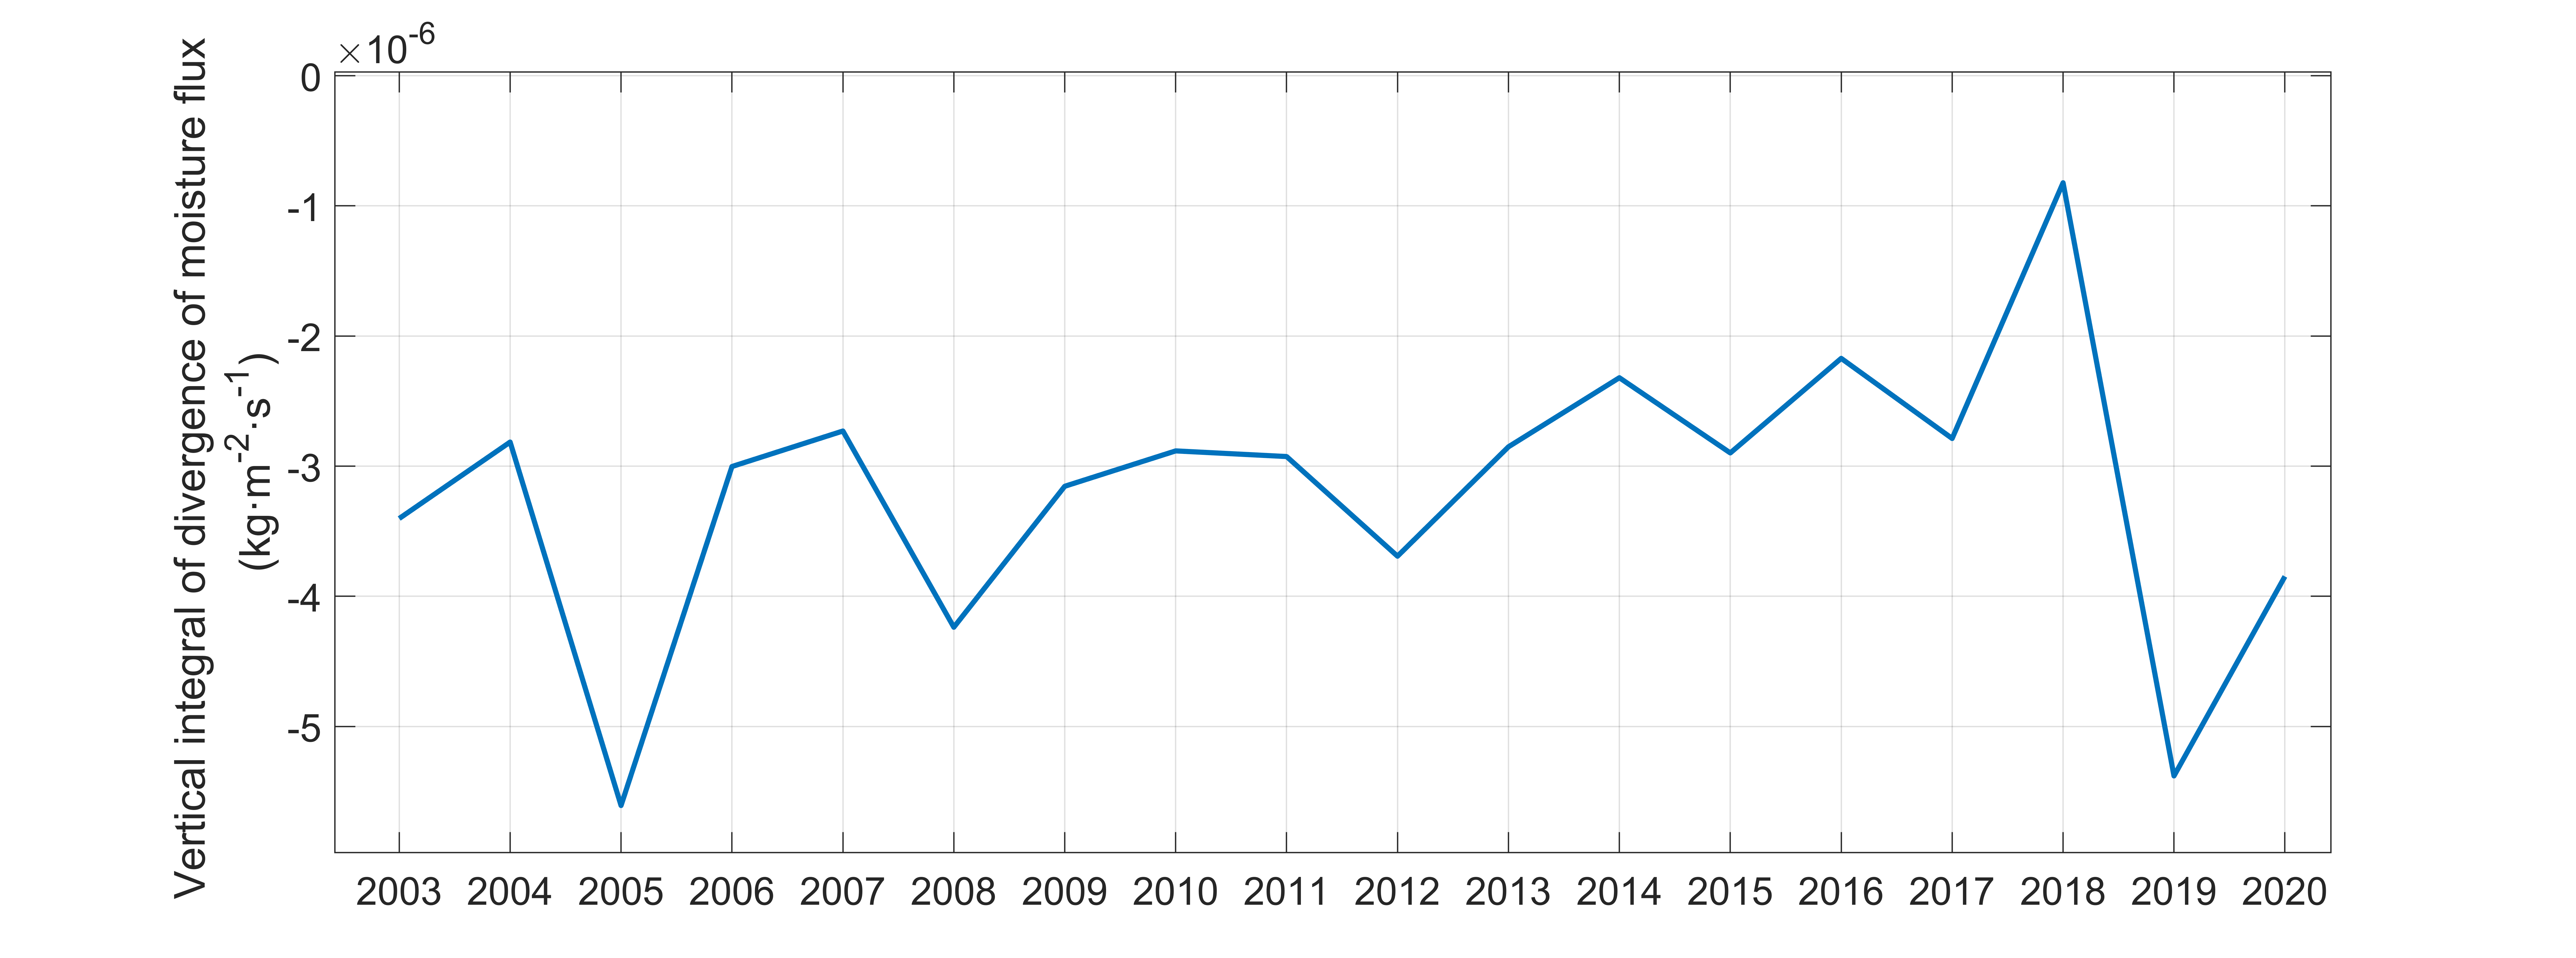


**Supplementary Figure 3.** Vertical integral of divergence of moisture flux over the TP from 2003 to 2020.
